# Supplementary material
Source: PubMed Central journal article supplement (PMC3889571)
Supplement: EC.00128-13_zek999094193so1.pdf [file EC.00128-13_zek999094193so1.pdf]

Diploid *MTLa*

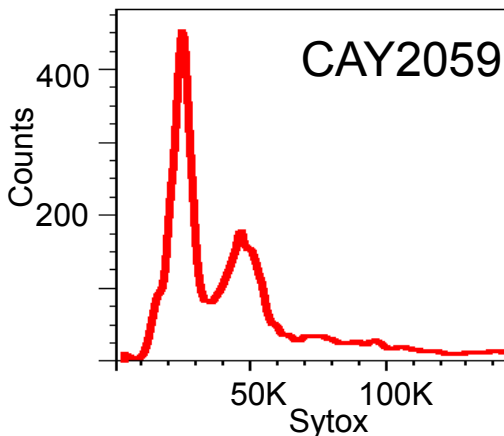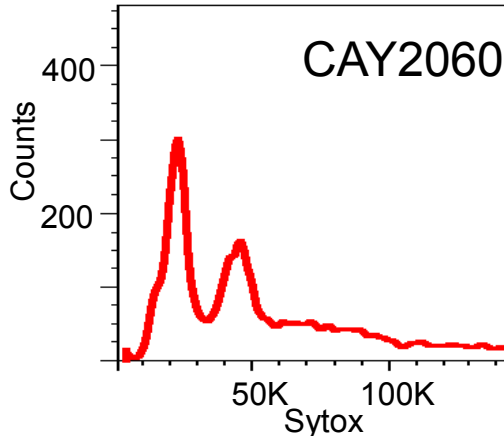

Diploid *MTLa*

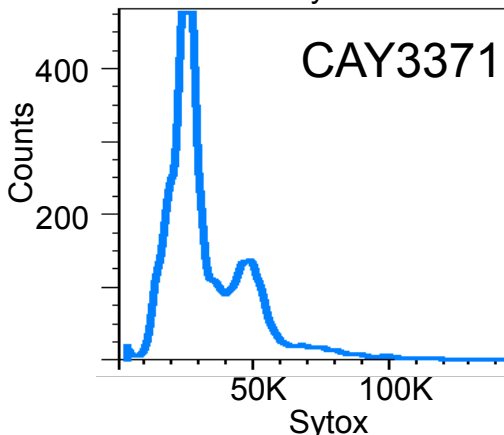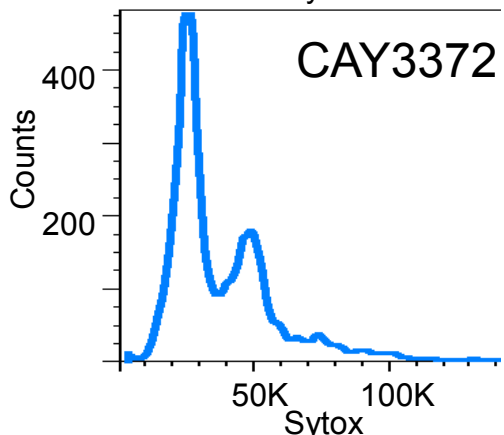

Tetraploid *MTLa/α*

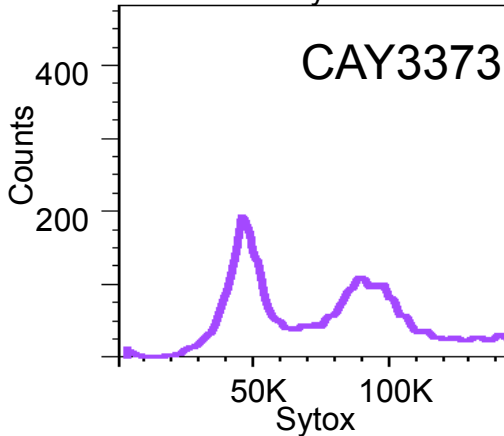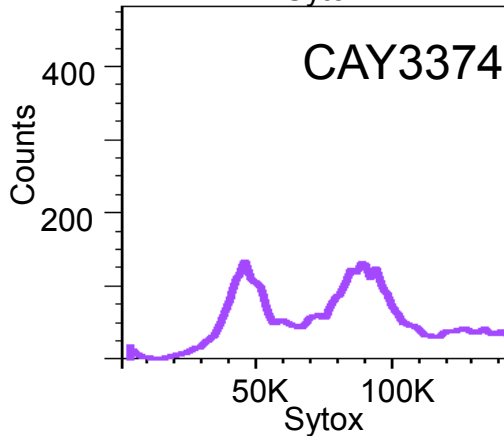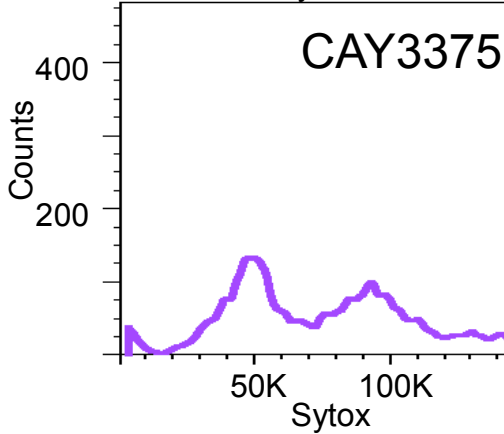

**Cell cytometric analysis of diploid parent strains and tetraploid progeny.**

The x-axis (Sytox) represents a linear scale of fluorescence, and the y-axis represents a linear scale of cell number. Red lines denote ploidy profiles of *MTLa* parental strains, and blue lines denote ploidy profiles of *MTLa* parental strains. Purple lines denote ploidy profiles of tetraploid progeny.
